# Supplementary material
Source: PubMed Central journal article supplement (PMC3125819)
Supplement: supp_79_6_2460__1.pdf [file supp_79_6_2460__1.pdf]

**Supplemental Materials:**

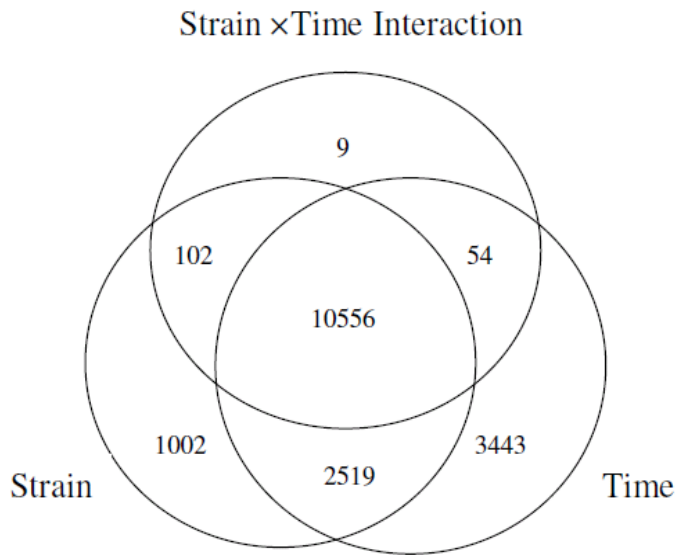

**Supplemental Fig. 1:** The number of differentially expressed probe sets identified in strain, time and their interaction effects.

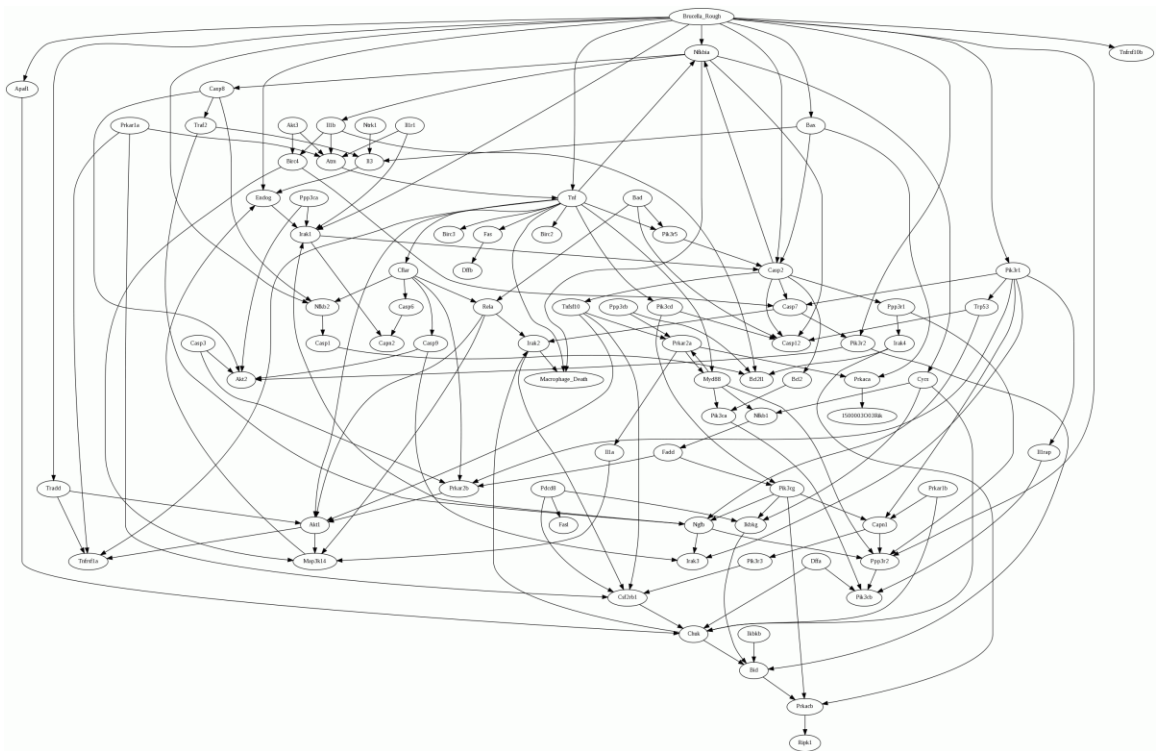

**Supplemental Fig. 2.** Top Bayesian network out of miniTUBA modeling. Fig. 2 demonstrates a portion of this network.
